# Supplementary material
Source: PubMed Central journal article supplement (PMC7744016)
Supplement: mmc2.pdf [file mmc2.pdf]

# THE LANCET

## Child & Adolescent Health

### Supplementary appendix

This appendix formed part of the original submission and has been peer reviewed.  
We post it as supplied by the authors.

Supplement to: Lindan CE, Mankad K, Ram D, et al. Neuroimaging manifestations in children with SARS-CoV-2 infection: a multinational, multicentre collaborative study. *Lancet Child Adolesc Health* 2020; published online Dec 15. [http://dx.doi.org/10.1016/S2352-4642\(20\)30362-X](http://dx.doi.org/10.1016/S2352-4642(20)30362-X).

# Appendix

## Neuroimaging Manifestations in Children with SARS-CoV-2: A Multi-National Multi-Centre Collaborative Study

Camilla E Lindan, Kshitij Mankad, Dipak Ram, Larry K Kociolek, V Michelle Silvera, Nathalie Boddaert, Stavros Michael Stivaros\*, Susan Palasis\*, on behalf of the ASPNR PECOBIG Collaborator Group

|                   |                                                   |                                                                                                                                                                                                                                                                                                                                                                   |
|-------------------|---------------------------------------------------|-------------------------------------------------------------------------------------------------------------------------------------------------------------------------------------------------------------------------------------------------------------------------------------------------------------------------------------------------------------------|
| <b>Category 1</b> | Acute COVID-19                                    | <ul style="list-style-type: none"> <li>• Clinical criteria for acute SARS-CoV-2 infection fulfilled*</li> <li>• RT-PCR or antigen test positive for current SARS-CoV-2 infection</li> <li>• Serology for SARS-CoV-2 Ab positive, negative, or not tested ¶</li> <li>• Does not meet CDC criteria of MIS-C (PIMS-TS) §</li> <li>• Neurologic symptoms</li> </ul>   |
| <b>Category 2</b> | Asymptomatic acute or subacute COVID-19 infection | <ul style="list-style-type: none"> <li>• Clinical criteria for acute SARS-CoV-2 infection NOT fulfilled*</li> <li>• RT-PCR or antigen test positive for current SARS-CoV-2 infection</li> <li>• Serology for SARS-CoV-2 positive, negative, or not tested ¶</li> <li>• Does not meet CDC criteria for MIS-C (PIMS-TS) §</li> <li>• Neurologic symptoms</li> </ul> |
| <b>Category 3</b> | MIS-C (PIMS-TS)                                   | <ul style="list-style-type: none"> <li>• CDC Criteria for MIS-C (PIMS-TS) fulfilled §</li> <li>• Serology for SARS-CoV-2 positive ¶</li> <li>• RT-PCR or antigen test for SARS-CoV-2 positive, negative, or not tested</li> <li>• Neurologic symptoms</li> </ul>                                                                                                  |
| <b>Category 4</b> | Indeterminate                                     | <ul style="list-style-type: none"> <li>• Serology for SARS-CoV-2 positive ¶</li> <li>• RT-PCR or antigen test for SARS-CoV-2 negative or not tested</li> <li>• Does not meet CDC Criteria for MIS-C (PIMS-TS) §</li> <li>• Neurologic symptoms</li> </ul>                                                                                                         |

Table 1: Clinical Categorization Criteria. \*Confirmation of Acute COVID infection made based on CDC clinical criteria only: Coronavirus Disease 2019 (COVID-19) 2020 Interim Case Definition, Approved April 5, 2020 <https://wwwn.cdc.gov/nndss/conditions/coronavirus-disease-2019-covid-19/case-definition/2020/> ¶ IgG or total serology if assay does not differentiate IgG; positive IgM with negative IgG does not meet this criterion § Criteria for MIS-C (PIMS-TS) is made based on criteria detailed in the following site: Multisystem Inflammatory Syndrome in Children (MIS-C) Associated with Coronavirus Disease 2019 (COVID-19) <https://emergency.cdc.gov/han/2020/han00432.asp>

|                                        |                                                                                                                             |
|----------------------------------------|-----------------------------------------------------------------------------------------------------------------------------|
| Submitting Neuroradiologist            | Free Text                                                                                                                   |
| Additional Collaborators               | Free Text                                                                                                                   |
| Patient Age                            | Years/months                                                                                                                |
| Gender                                 | Free Text                                                                                                                   |
| Ethnicity                              | Free Text                                                                                                                   |
| Clinical Presentation History          | Free Text                                                                                                                   |
| Co-morbidities                         | Free Text                                                                                                                   |
| Date of Onset of Neurological Symptoms | Date                                                                                                                        |
| Acute Covid CDC Criteria Fulfilled     | Y/N                                                                                                                         |
| MIS-C Criteria Fulfilled               | Y/N                                                                                                                         |
| Dates of CT imaging #1,2,3....         | Date                                                                                                                        |
| Dates of MRI imaging #1,2,3...         | Date                                                                                                                        |
| PCR antigen testing                    | Y/N                                                                                                                         |
| PCR antigen testing dates              | Date                                                                                                                        |
| PCR antigen testing results            | +ve/-ve                                                                                                                     |
| Covid serology testing                 | Y/N                                                                                                                         |
| Covid serology testing date            | Date                                                                                                                        |
| Covid Serology testing result          | +ve/-ve                                                                                                                     |
| CSF testing                            | Y/N                                                                                                                         |
| CSF testing dates                      | Date                                                                                                                        |
| CSF testing results                    | WCC and differential, protein, glucose, Next Generation Sequencing if available, additional infectious studies with results |
| Date of patient assessment             | Date                                                                                                                        |
| Patient clinical outcome               | Free Text                                                                                                                   |
| Date of patient discharge              | Date                                                                                                                        |
| Status at discharge                    | Normal, neurological deficit (specify) or death                                                                             |

Table 2: Data Response Headers and Field Types

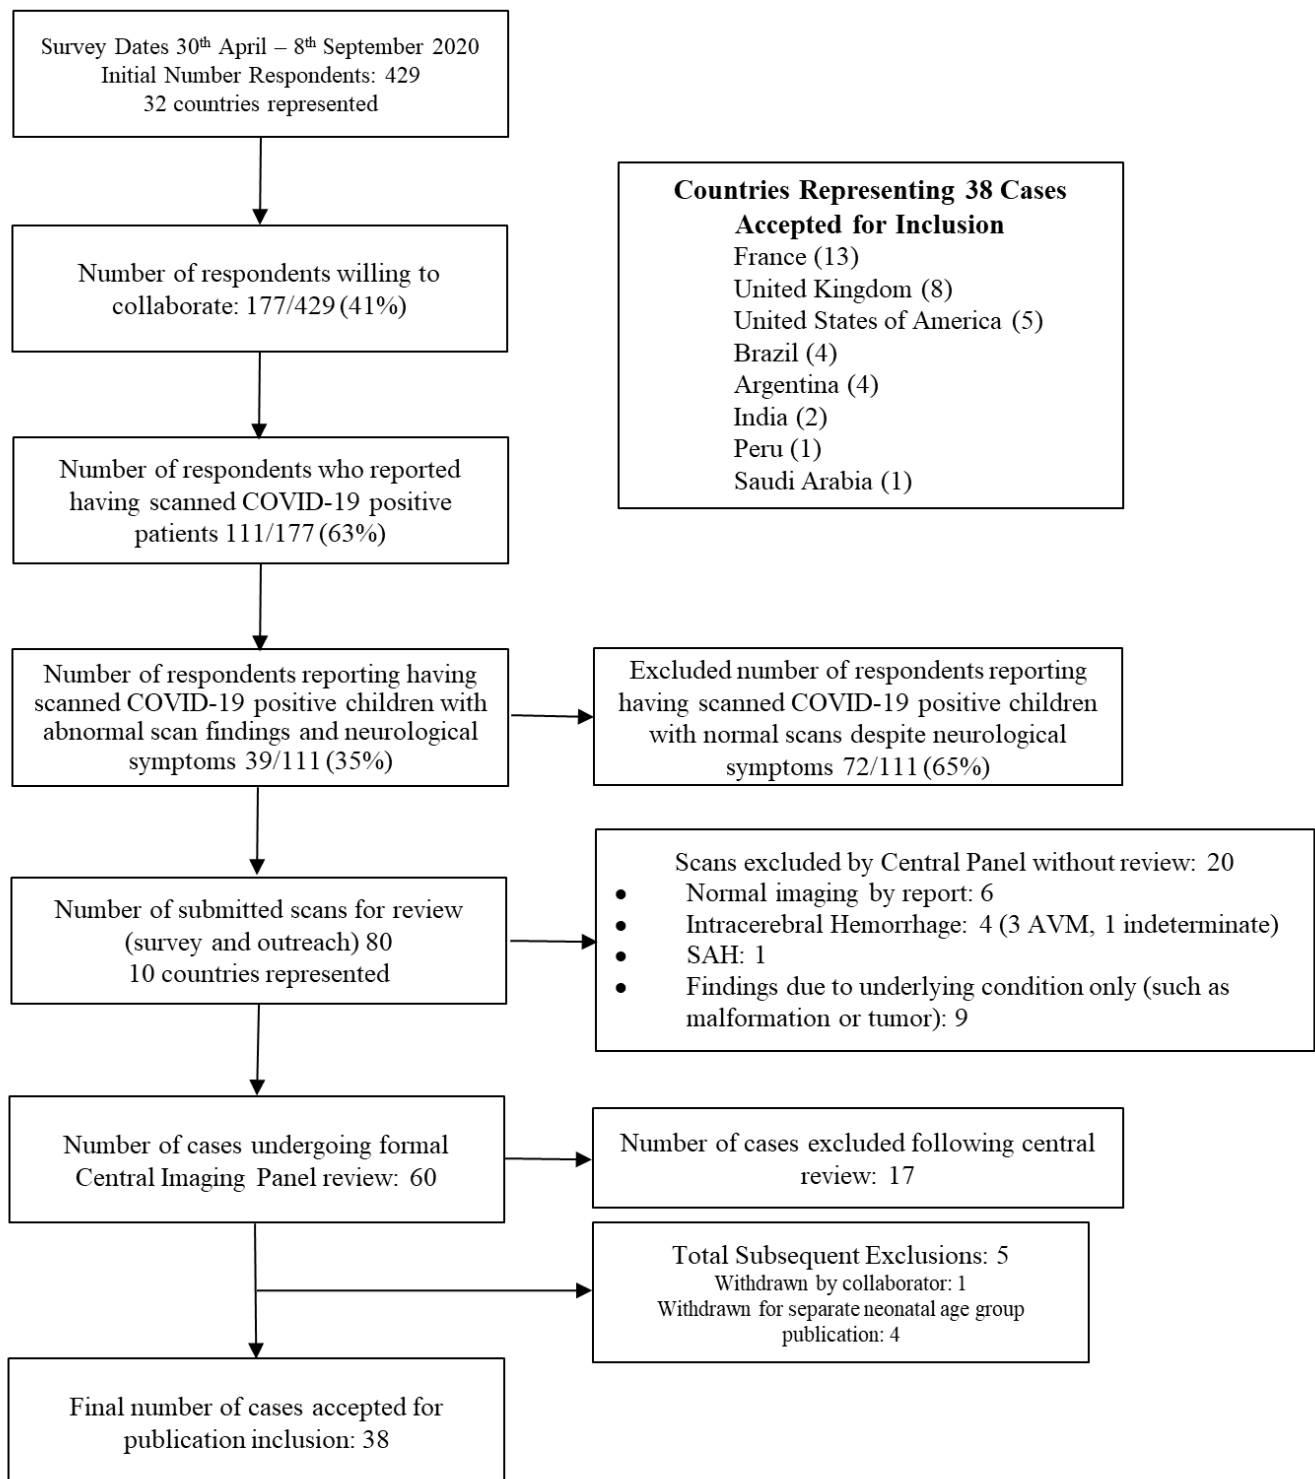

Supplemental figure 1: Survey responses, case inclusion and exclusion diagram.

| Case Number                              | Institution                                                                                                    |
|------------------------------------------|----------------------------------------------------------------------------------------------------------------|
| 1                                        | Bai Jerbai Wadia Hospital for Children's Hospital, Mumbai, India                                               |
| 2, 26                                    | Royal Manchester Children's Hospital, Manchester, UK                                                           |
| 3                                        | Hospital Israelita Albert Einstein , São Paulo, Brazil                                                         |
| 4                                        | Hospital Nacional Edgardo Rebagliati Martins, Jesús María, Peru                                                |
| 5                                        | University of New Mexico Hospital, Albuquerque, NM, USA                                                        |
| 6, 9, 11, 24 ,25, 31, 32, 33, 35, 36, 38 | Hôpital Necker Enfants Malades, Assistance Publique Hôpitaux de Paris, APHP, Université de Paris, France       |
| 7                                        | King Saud bin Abdulaziz university for health science King Abdullah Specialized children hospital, Riyadh, KSA |
| 8*                                       | William Beaumont Hospital, Royal Oak , MI, USA                                                                 |
| 10, 14, 15, 17                           | Garrahan Hospital, Buenos Aires, Argentina                                                                     |
| 12, 19                                   | Instuto Dr José Frota, Fortaleza, Ceará, Brazil                                                                |
| 13                                       | Rainbow Children's Hospital, Hyderabad, India                                                                  |
| 16*                                      | Lucile Packard Children's Hospital, Stanford, CA, USA                                                          |
| 18                                       | Ann & Robert H. Lurie Children's Hospital of Chicago, IL , USA                                                 |
| 20                                       | Children's National Hospital, Washington, DC, USA                                                              |
| 21                                       | La Timone University Hospital, APHM, Marseille, France                                                         |
| 22, 23, 27, 28, 30, 37                   | Great Ormond Street Hospital for Children, London, UK                                                          |
| 29*                                      | Holtz Children's Hospital, University of Miami Miller School of Medicine, Miami, FL, USA                       |
| 34                                       | Hospital das Clínicas da Faculdade de Medicina da Universidade de São Paulo Brazil                             |

\*Institutional confirmation that IRB approval is not required for single case submission

Table 3: Institutions supplying cases and associated IRB approval

| Clinical Category | Number (%) | Male (%) | Age Range, years (Median) |
|-------------------|------------|----------|---------------------------|
| 1                 | 12 (32%)   | 58       | 0-17-16 (6)               |
| 2                 | 8 (21%)    | 50       | 0.25-16 (12)              |
| 3                 | 11 (29%)   | 45       | 1-5-16 (10)               |
| 4                 | 7 (18%)    | 71       | 0.83 – 14.25 (7)          |

Table 4: Demographics of cases by clinical categorization.

| Patient identifier | Age (years) & Sex | Co-Morbidity                            | Clinical Presentation                                                                                                      | Onset-Imaging (days) | Imaging Findings                                                                                                                                                                                                                                                                                                                                                                                                                                                  | Disease Pattern                                       | Clinical Management                                                                                                                                                                                                          | Clinical Outcome & Additional information                                                                                |
|--------------------|-------------------|-----------------------------------------|----------------------------------------------------------------------------------------------------------------------------|----------------------|-------------------------------------------------------------------------------------------------------------------------------------------------------------------------------------------------------------------------------------------------------------------------------------------------------------------------------------------------------------------------------------------------------------------------------------------------------------------|-------------------------------------------------------|------------------------------------------------------------------------------------------------------------------------------------------------------------------------------------------------------------------------------|--------------------------------------------------------------------------------------------------------------------------|
| 1                  | 0.17 M            | None                                    | Fever, Cough, Seizures                                                                                                     | 1                    | Brain: Multifocal T2 hyperintensity throughout bilateral thalami.                                                                                                                                                                                                                                                                                                                                                                                                 | ADEM-like                                             | Supportive measures in ICU, Anti-epileptic drugs (AED's)                                                                                                                                                                     | Normal at discharge 8 days after presentation.                                                                           |
| 2                  | 1.17 F            | None                                    | Fever, encephalopathy, dystonic posturing, seizures                                                                        | 2                    | BRAIN: Confluent areas of T2 hyperintensity and restricted diffusion in the central gray, pons, and subcortical white matter. Splenial lesion.<br>SPINE: Normal                                                                                                                                                                                                                                                                                                   | ADEM-like                                             | Intubated, supportive measures in ICU, AED's                                                                                                                                                                                 | Normal at discharge 1 month after presentation.                                                                          |
| 3                  | 9 M               | Mild asthma                             | Fever, cough, headache, encephalopathy, photophobia, phonophobia, seizures                                                 | 5                    | BRAIN:<br><i>Presentation:</i> Diffuse leptomeningeal enhancement. Patchy T2 hyperintensity of cerebral white matter and cerebellum. Cortical, thalamic and splenial signal abnormalities.<br><i>Follow-up 2.5 weeks:</i> Extension of T2 signal abnormalities. Hyperintensity of optic chiasm and bilateral CST.<br><i>Follow-up 4.5 weeks:</i> Progressive optic chiasm T2 hyperintensity. Resolved CST, brainstem and splenial signal changes. Global atrophy. | ADEM-like                                             | Intubated, supportive measures in ICU, intravenous immunoglobulin (IVIG).                                                                                                                                                    | Normal at discharge 5 weeks after presentation.                                                                          |
| 4                  | 13 M              | None                                    | Fever, headache, lower limb weakness                                                                                       | 1                    | BRAIN: Extensive patchy white matter and basal ganglia T2 hyperintensities, Associated mass effect and mild enhancement R frontal lobe.<br>SPINE: Long segment mildly expansive central cord T2 hyperintensity. No post contrast imaging of spine.                                                                                                                                                                                                                | ADEM-like<br>Myelitis                                 | IV high dose steroids                                                                                                                                                                                                        | Normal at discharge 2 weeks after presentation.                                                                          |
| 5 *                | 3 F               | None                                    | Upper and lower extremity weakness, acute respiratory failures, confusion. Family members recently deceased from COVID-19. | 1                    | BRAIN: Normal<br>SPINE:<br><i>Presentation:</i> Expansile T2 hyperintense signal from obex to mid-thoracic cord with mild enhancement.<br><i>Follow-up 4 days:</i> Worsening cord edema with extensive restricted diffusion, hemorrhagic change & enhancement<br><i>Follow-up 3 weeks:</i> Interval myelomalacia with persistent restricted diffusion                                                                                                             | Myelitis                                              | Supportive measures in ICU, intubated. CSF cultures negative.                                                                                                                                                                | Quadriplegic, tracheostomy, ventilator dependent, G-tube at time of manuscript submission, six months after presentation |
| 6                  | 5.5 M             | Sickle cell post bone marrow transplant | Acute facial paralysis, respiratory failure                                                                                | 21                   | BRAIN: Enhancement of CN VII and XII                                                                                                                                                                                                                                                                                                                                                                                                                              | Neuritis: CN                                          | IVIG                                                                                                                                                                                                                         | Normal cranial nerve exam at discharge 1 month after presentation                                                        |
| 7                  | 9 M               | None                                    | Dysarthria, ophthalmoplegia gait disturbance, back pain, reduced lower limb reflexes.                                      | 2                    | BRAIN: Enhancement of CN V-VIII<br>SPINE: Enhancement of cauda equina and cervical nerve roots.                                                                                                                                                                                                                                                                                                                                                                   | Neuritis: CN and cauda equina                         | IVIG                                                                                                                                                                                                                         | Normal at discharge 1 month after presentation.                                                                          |
| 8*                 | 5 F               | None                                    | Fever, headache, seizures. Parents both positive for COVID-19 and negative for TB.                                         | 2                    | BRAIN:<br><i>Presentation:</i> Small left frontal infarction, minimal leptomeningeal enhancement.<br><i>Follow-up 3 days:</i> Hydrocephalus<br><i>Multiple follow-up MRI exams:</i> Progressive basilar meningitis, hydrocephalus, herniation. Diffuse cerebral edema and absent cerebral arterial flow on MRA 3.5 weeks after presentation.<br>SPINE 3.5 weeks after presentation: Central gray abnormal signal and extensive cervical cord edema                | Co-infection: TB<br>Vasculitic/Thrombotic<br>Myelitis | Supportive measures with multiple medications, intubated in ICU.<br>EVD insertion.<br>Suboccipital craniectomy with cerebellar brain biopsy.<br><br>Brain biopsy: TB positive necrotizing granulomata, vasculitis & electron | Death one month after presentation                                                                                       |

|    |           |          |                                                                                                   |   |                                                                                                                                                                                                                                                                                                                                                                                                                                                                                                       |                                                                |                                                                                                                                                                                                                                                                   |                                                     |
|----|-----------|----------|---------------------------------------------------------------------------------------------------|---|-------------------------------------------------------------------------------------------------------------------------------------------------------------------------------------------------------------------------------------------------------------------------------------------------------------------------------------------------------------------------------------------------------------------------------------------------------------------------------------------------------|----------------------------------------------------------------|-------------------------------------------------------------------------------------------------------------------------------------------------------------------------------------------------------------------------------------------------------------------|-----------------------------------------------------|
|    |           |          |                                                                                                   |   |                                                                                                                                                                                                                                                                                                                                                                                                                                                                                                       |                                                                | microscopy positive for viral inclusions compatible with COVID-19.                                                                                                                                                                                                |                                                     |
| 9  | 5.67<br>F | None     | Fever, encephalopathy, acute respiratory distress following 5 day history of varicella and cough. | 1 | BRAIN: Scattered microhemorrhages and small infarcts in the superficial and deep white matter and in the CC                                                                                                                                                                                                                                                                                                                                                                                           | Co-infection: Bacterial and viral<br><br>Vasculitic/Thrombotic | Intubated, supportive measures in ICU. CT chest COVID-19 infiltrates. After 2 weeks, neurological decline, failed extubation. EEG with no activity. In addition to PCR COVID positive: MRSA cultures positive in CSF & blood. VZV positive by serology & CSF PCR. | Death fifteen days after neurological symptom onset |
| 10 | 6<br>M    | None     | Fever, headache, vomiting, right hemiparesis. No family history of TB.                            | 1 | BRAIN:<br><i>Presentation:</i> Enhancing choroid plexus in left lateral ventricle & bilateral foramina of Luschka. Ependymal enhancement lateral ventricle with DWI restricting material in occipital horn. Small enhancing cerebral abscesses with reduced diffusion.<br><i>Multiple follow-up Brain CT and MRI exams:</i> Progressive hydrocephalus, extensive thick periventricular T2 hyperintensity and diffusion restriction. Improved abscesses and plexitis on treatment for TB and steroids. | Co-infection: TB                                               | Supportive measures in ICU. Brain biopsy positive for TB granuloma. Aggressive medical treatment for TB.                                                                                                                                                          | Death one month after presentation                  |
| 11 | 16<br>M   | None     | Fever, sinusitis, meningismus, encephalopathy                                                     | 8 | BRAIN: Sinusitis, rapidly progressive cavernous sinus thrombosis, ophthalmic vein thrombosis, leptomeningitis, CN enhancement, multivessel vasculitis with vessel wall enhancement. Multiterritory ischemic infarction.                                                                                                                                                                                                                                                                               | Co-infection: Bacterial<br><br>Vasculitic/Thrombotic           | Supportive measures in ICU, antibiotics. Blood and CSF cultures: fusobacterium necrophorum and streptococcus constellatus infection.                                                                                                                              | Death two weeks following presentation.             |
| 12 | 15<br>F   | Pregnant | 27 weeks pregnant, fever, seizures and hypertension. Subsequent respiratory symptoms day 4.       | 6 | BRAIN:<br><i>Presentation Head CT:</i> Subcortical edema bilateral occipital, posterior temporal, frontal lobes.<br><i>Follow-up Brain MRI day 7:</i> Bilateral parasagittal and deep white matter T2 hyperintensity with restricted diffusion. Left occipital acute cortical infarction.                                                                                                                                                                                                             | Vasculitic/Thrombotic                                          | Supportive measures in ICU. Mother delivered of baby at presentation, born at 27 weeks gestation. Chest CT day 4: COVID-19 pattern infiltrates                                                                                                                    | Normal at discharge 2 weeks after presentation.     |

Table 5: Category 1. Cases of acute COVID-19 infection with classic respiratory symptoms and a positive nasopharyngeal PCR. White: ADEM-like with or without myelitis. Light gray: Acute necrotizing myelitis. Intermediate gray: Neuritis. Dark gray: Co-infection. Darkest gray: Vasculitic-thrombotic. \*Case published as case reports in clinical-based journal. Freij BJ, Gebara BM, Tariq R, Wang AM, Gibson J, El-Wiher N, et al. Fatal central nervous system co-infection with SARS-CoV-2 and tuberculosis in a healthy child. BMC pediatrics. 2020;20(1):429. & Kaur H, Mason JA, Bajracharya M, McGee J, Gunderson MD, Hart BL, et al. Transverse Myelitis in a Child With COVID-19. Pediatric neurology. 2020;112:5-6.

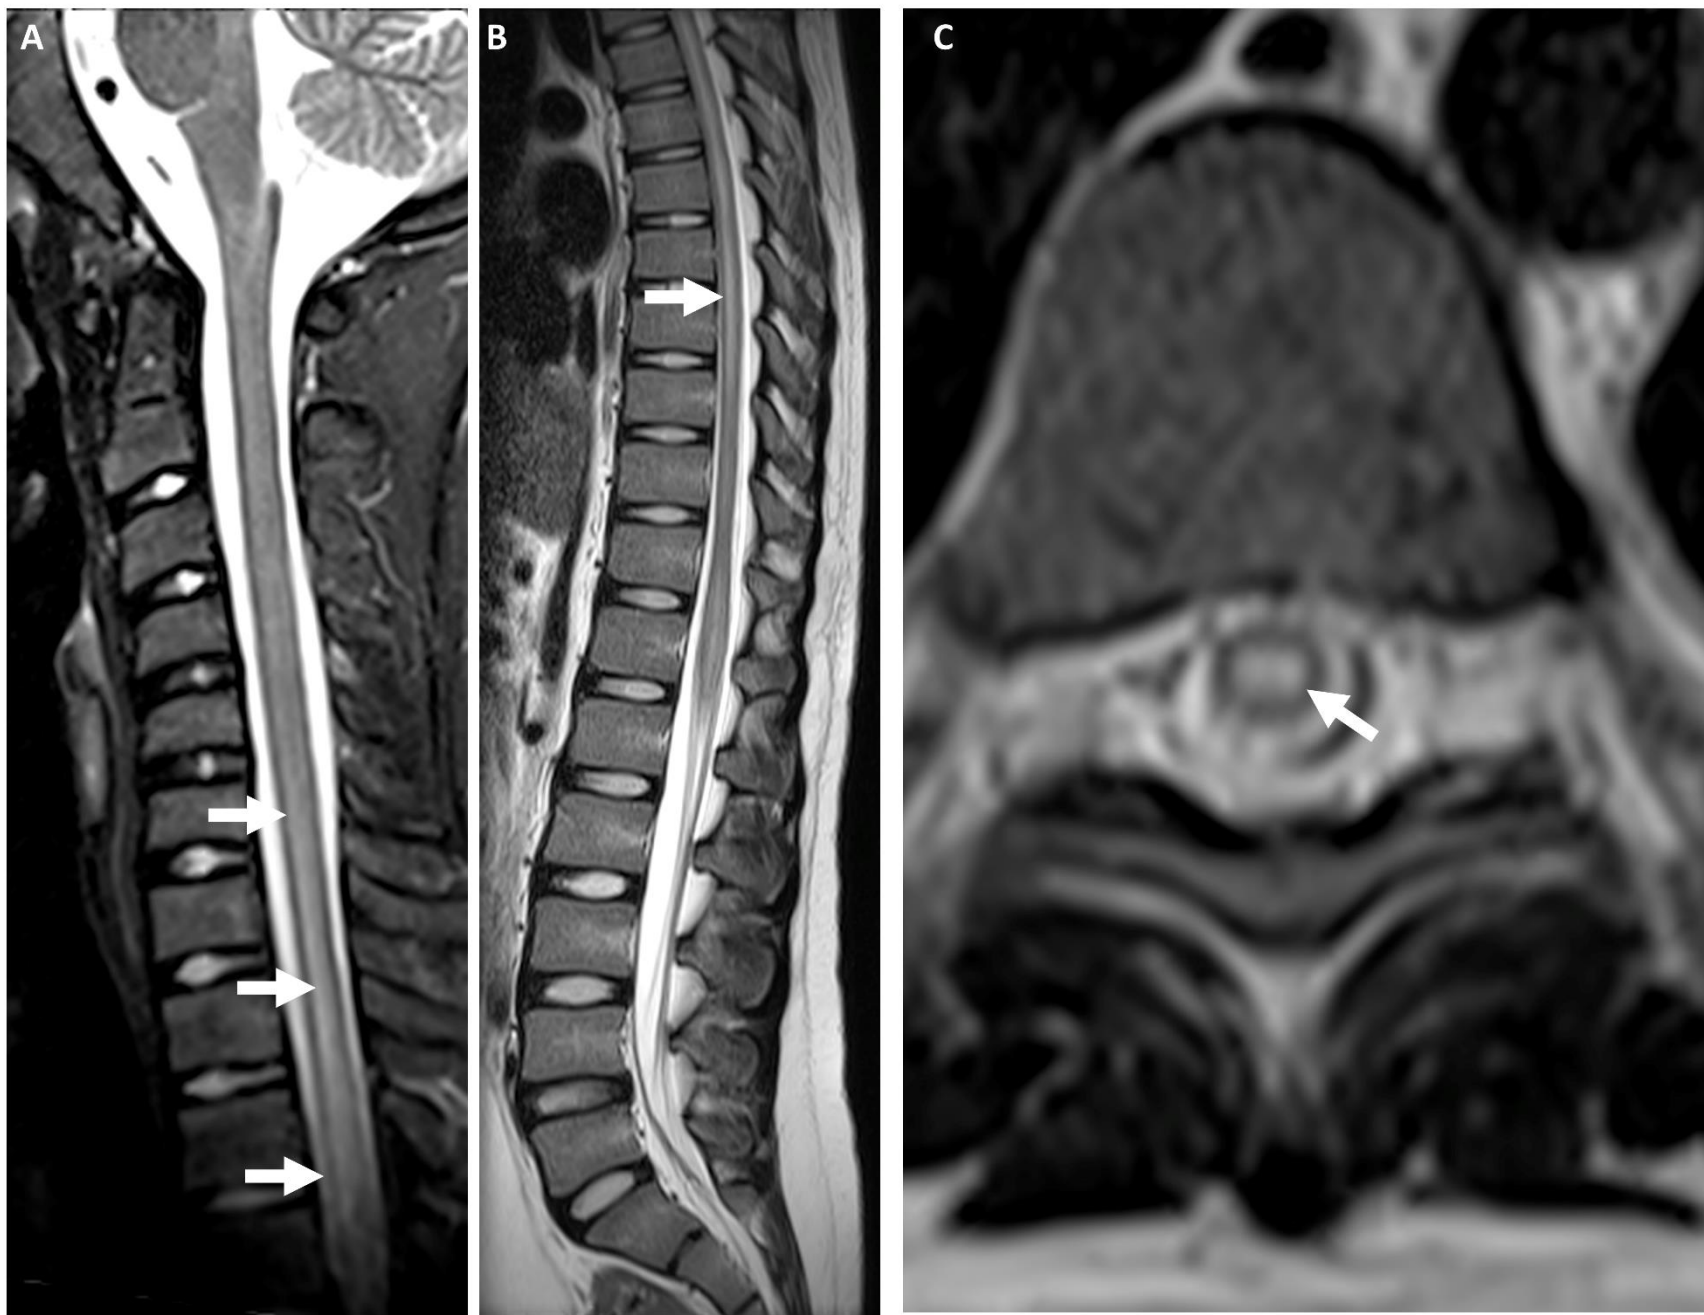

Supplemental figure 2: Myelitis – 13-year-old boy (Case 4) who presented with fever, headache and lower limb weakness in the acute COVID-19 category. Extensive ADEM-like brain changes seen in figure 2, (panels C and D). He also had long segment, mildly expansive cord T2 hyperintensity as shown on the sagittal T2-weighted images (panels A and B; arrows). Note on the axial T2-weighted image (panel C) how these changes are centrally located in the cord (arrow).

| Patient Identifier | Age (years)<br>Sex | Co-Morbidity | Clinical Presentation                                                                                                                                                            | Onset-Imaging (days) | Imaging Findings                                                                                                                                                                                                                                                   | Disease Pattern                                      | Clinical Management                                                                                                                                      | Clinical Outcome & Additional information                                                                          |
|--------------------|--------------------|--------------|----------------------------------------------------------------------------------------------------------------------------------------------------------------------------------|----------------------|--------------------------------------------------------------------------------------------------------------------------------------------------------------------------------------------------------------------------------------------------------------------|------------------------------------------------------|----------------------------------------------------------------------------------------------------------------------------------------------------------|--------------------------------------------------------------------------------------------------------------------|
| 13                 | 0.25<br>M          | None         | Lower > upper limb spasticity and brisk DTR's, reduced weight bearing.<br>20 days prior to neurologic symptoms: Cough without fever, positive PCR & family exposure to COVID-19. | 12                   | BRAIN: T2 hyperintensity brainstem<br>SPINE: Long segment cord T2 hyperintensity with central gray matter predominance.<br>No post contrast imaging.                                                                                                               | ADEM-like<br><br>Myelitis                            | IVIg                                                                                                                                                     | Resolved motor findings with residual delayed bladder emptying at 2.5 months following presentation.               |
| 14                 | 1.58<br>F          | None         | Irritability, gait impairment, constipation.                                                                                                                                     | 3                    | BRAIN: Punctate and linear T2 hyperintense foci and enhancement in subcortical white matter<br>SPINE: Long segment T2 hyperintensity with central gray matter predominance and patchy enhancement. Enhancement of cauda equina.                                    | ADEM-like<br>Neuritis: cauda equina<br>Myelitis      | High dose steroids                                                                                                                                       | Normal at discharge 2 weeks after presentation                                                                     |
| 15                 | 12<br>M            | None         | Fever, diarrhoea, urinary retention, hyperreflexia                                                                                                                               | 3                    | SPINE: Long segment T2 hyperintensity from the obex through the mid thoracic cord, with central predominance. No post contrast imaging.                                                                                                                            | Myelitis                                             | High dose steroids                                                                                                                                       | Improvement at follow-up 2 weeks after presentation, requires urinary catheter.                                    |
| 16                 | 14<br>F            | None         | Fever, encephalopathy, seizures, subsequent respiratory failure due to aspiration (not COVID-19 pattern on chest CT)                                                             | 2                    | BRAIN:<br><i>Presentation:</i> Normal<br><i>Follow-up 4 weeks:</i> Patchy T2 hyperintensity white matter and basal ganglia, brainstem, cerebellar peduncles. No restricted diffusion or enhancement.<br><i>Follow-up 8 weeks:</i> Global atrophy, otherwise normal | ADEM-like                                            | Intubated, supportive measures in ICU.<br>Diagnosed with COVID-19 triggered anti-NMDAR auto-immune encephalitis.<br>Numerous immunomodulatory therapies. | Remains an inpatient 6 months following presentation.<br>Tracheostomy, ventilator dependent, G-tube, dysautonomia. |
| 17                 | 9<br>M             | None         | Gait difficulty<br>High CSF protein                                                                                                                                              | 2                    | SPINE: Enhancement and thickening of cauda equina & cervical spinal nerve roots                                                                                                                                                                                    | Neuritis:<br>CN, cauda equina and spinal nerve roots | IVIg                                                                                                                                                     | Normal at follow-up 3 weeks after presentation.                                                                    |
| 18                 | 14<br>M            | None         | Bilateral facial palsy, myalgias, diarrhea, blurred vision.<br>High CSF protein                                                                                                  | 15                   | BRAIN: Enhancement CN III, V-VII, XII<br>SPINE: Enhancement and thickening of cauda equina. Enhancement of spinal nerve roots.                                                                                                                                     | Neuritis:<br>CN and cauda equina                     | IVIg                                                                                                                                                     | Improvement but incomplete resolution at follow-up visit 6 weeks after presentation.                               |
| 19                 | 16<br>F            | Pes Cavus    | Diarrhea, crural paraesthesia & hypoesthesia progressing to T8 sensory level within hours<br>High CSF protein                                                                    | 3                    | BRAIN: Enhancement of CN III, VI-VIII<br>SPINE: Enhancement of cauda equina                                                                                                                                                                                        | Neuritis:<br>CN and cauda equina                     | High dose steroids IVIg                                                                                                                                  | Normal at discharge 3.5 weeks after presentation.                                                                  |
| 20                 | 15<br>F            | None         | Fever, headache, confusion                                                                                                                                                       | 2                    | Brain: Complete thrombosis superior sagittal sinus. Bilateral haemorrhagic venous infarctions left frontal and right parietal lobes.                                                                                                                               | Vasculitic/Thrombotic                                | Therapeutic anticoagulation                                                                                                                              | Normal neurologic exam 6 weeks after presentation                                                                  |

Table 6: Category 2. Cases of acute or subacute COVID-19 infection with positive nasopharyngeal PCR, without clinically acute COVID-19 symptoms by established CDC criteria. White: ADEM-like with/without/or myelitis. Light gray: Neuritis. Intermediate gray: Vasculitic-thrombotic.



| Patient Identifier | Age (years) | Co-Morbidity | Clinical Presentation                                                                                                                          | Onset-Imaging (days) | Imaging Findings                                                                                                                                                                                                                                                                              | Disease Pattern                                       | Clinical Management                                                           | Clinical Outcome & Additional information                                                                                                                  |
|--------------------|-------------|--------------|------------------------------------------------------------------------------------------------------------------------------------------------|----------------------|-----------------------------------------------------------------------------------------------------------------------------------------------------------------------------------------------------------------------------------------------------------------------------------------------|-------------------------------------------------------|-------------------------------------------------------------------------------|------------------------------------------------------------------------------------------------------------------------------------------------------------|
| 21                 | 5 F         | None         | MISC-C syndrome with encephalopathy, fever, abdominal pain, diarrhoea. No seizures.                                                            | 1                    | BRAIN: T2 hyperintensity cerebral white WM. Focal CC and splenial lesions CC T2 hyperintensity and restricted diffusion                                                                                                                                                                       | ADEM-like<br>Splenial lesion                          | Supportive measures in ICU                                                    | Normal at discharge 8 days after presentation.                                                                                                             |
| 22                 | 9 M         | None         | MIS-C syndrome with encephalopathy, gait impairment.                                                                                           | 11                   | BRAIN: T2 hyperintensity cerebral white WM. Myositis: Enhancement of upper cervical musculature.                                                                                                                                                                                              | ADEM-like<br>Myositis                                 | Supportive measures in ICU                                                    | Normal at follow-up 5 weeks after presentation.                                                                                                            |
| 23*                | 9 M         | None         | MIS-C syndrome with fever, headache, neck pain, encephalopathy, cerebellar signs, weakness.                                                    | 2                    | BRAIN: T2 hyperintensity cerebral WM. Splenial lesion T2 hyperintensity and restricted diffusion Myositis: Upper cervical soft tissues & muscles of mastication.                                                                                                                              | ADEM-like<br>Splenial lesion<br>Myositis              | Supportive measures in ICU. Intubated. Hypotensive shock.                     | Improvement at follow-up 3 months after presentation with residual lower limb weakness.                                                                    |
| 24                 | 13.25 F     | None         | MIS-C syndrome with fever, headache encephalopathy, facial paralysis                                                                           | 1                    | BRAIN: T2 hyperintensity hypothalamus. Neuritis: Bilateral CN VII                                                                                                                                                                                                                             | ADEM-like<br>Neuritis: CN                             | Supportive measures in ICU                                                    | Improvement at discharge 10 days after presentation with mild facial palsy.                                                                                |
| 25                 | 13.83 F     | Asthma       | MIS-C syndrome with cardiac dysfunction, stupor, pyramidal signs                                                                               | 6                    | BRAIN: T2 hyperintensity hypothalamus. SPINE: Focal T2 hyperintensity in T-cord with central predominance                                                                                                                                                                                     | ADEM-like<br>Myelitis                                 | Supportive measures in ICU                                                    | Normal at discharge 2 weeks after presentation.                                                                                                            |
| 26                 | 14.5 M      | None         | MIS-C syndrome with fever, diarrhoea, encephalopathy, rash, hypotension.                                                                       | 8                    | BRAIN: T2 hyperintensity cerebral WM. Splenial lesion T2 hyperintensity and restricted diffusion                                                                                                                                                                                              | ADEM-like<br>Splenial lesion                          | Supportive measures ICU, intubated                                            | Normal at follow up 6 weeks after presentation                                                                                                             |
| 27*                | 15 F        | Obese        | MIS-C syndrome with fever, cough, dyspnea, encephalopathy, myalgias, leg swelling.                                                             | 18                   | BRAIN: <i>Presentation:</i> T2 hyperintensity cerebral WM. Splenial lesion T2 hyperintensity and restricted diffusion Innumerable microthrombi cerebrum, brainstem, cerebellum. <i>Follow-up 3 weeks:</i> Partial resolution of microthrombi. Complete resolution of WM and splenial lesions. | ADEM-like<br>Splenial lesion<br>Vasculitic/Thrombotic | Supportive measures ICU, intubated. Nephrotic. HLH haematologically confirmed | Normal at follow up 3 months after presentation.                                                                                                           |
| 28*                | 8 M         | None         | MIS-C syndrome with fever, headache, sore throat, visual hallucinations, abdominal pain, diarrhoea, vesicular palmar rash. Meningismus, shock. | 17                   | BRAIN: Splenial lesion T2 hyperintensity and restricted diffusion Focus of restricted diffusion right ventricle occipital horn. Punctate enhancement left temporal WM. Myositis: Suboccipital soft tissues                                                                                    | Splenial lesion<br>Myositis                           | Supportive measures in ICU. Intubated. Hypotensive shock.                     | Improvement at follow-up 6 weeks after presentation with residual mild encephalopathy, myopathy, emotional lability.                                       |
| 29                 | 10 M        | None         | MIS-C syndrome with fever, abdominal pain, altered mental status, gait impairment                                                              | 4                    | BRAIN: Splenial lesion with T2 hyperintensity. Enhancement left CN III                                                                                                                                                                                                                        | Splenial lesion<br>Neuritis: CN                       | Supportive measures in ICU. Intubated.                                        | Improvement at discharge 2 weeks after presentation with mild residual encephalopathy, cerebellar signs and left sided weakness. Lost to further follow-up |
| 30*                | 15 F        | None         | MIS-C syndrome with fever, sore throat, neck swelling, sores on tongue, diarrhoea, vomiting, weakness, incoherent speech.                      | 10                   | BRAIN: Splenial lesion T2 hyperintensity and restricted diffusion Myositis: Suboccipital soft tissues                                                                                                                                                                                         | Splenial lesion<br>Myositis                           | Supportive measures in ICU                                                    | Improvement at follow-up 3 months after presentation. Mild residual peripheral neuropathy.                                                                 |
| 31                 | 1.5 F       | None         | MIS-C syndrome with fever, rash, cough, four limb motor and bladder dysfunction                                                                | 3                    | BRAIN: Normal SPINE: Enhancement and thickening of the cauda equina                                                                                                                                                                                                                           | Neuritis: Cauda equina                                | Supportive measures in ICU.                                                   | <i>Improvement at 4 month follow up. Improved motor function, swallowing difficulties, requires bladder catheterization.</i>                               |

Table 7: Category 3. Cases fulfilling the MIS-C clinical criteria. White: ADEM-like changes and/or splenial lesions with our without myelitis, microthrombi or myositis. Intermediate gray: Neuritis. \*Cases previously published as clinical case series. Abdel-Mannan O, Eyre M, Lobel U, Bamford A, Eltze C, Hameed B, et al. Neurologic and Radiographic Findings Associated With COVID-19 Infection in Children. JAMA neurology. 2020.

| Patient Identifier | Age (years)<br>Sex | Co-Morbidity | Clinical Presentation                                                                                                                                                                                                                       | Imaging Findings                                                                                                                                                                                                                                                                                                                                                                                                                                                                                                             | Disease Pattern                              | Clinical Management                                                                                 | Clinical Outcome & Additional information                                                                                                                              |
|--------------------|--------------------|--------------|---------------------------------------------------------------------------------------------------------------------------------------------------------------------------------------------------------------------------------------------|------------------------------------------------------------------------------------------------------------------------------------------------------------------------------------------------------------------------------------------------------------------------------------------------------------------------------------------------------------------------------------------------------------------------------------------------------------------------------------------------------------------------------|----------------------------------------------|-----------------------------------------------------------------------------------------------------|------------------------------------------------------------------------------------------------------------------------------------------------------------------------|
| 32                 | 2.67<br>F          | None         | 3 days prior to neurologic presentation: Fever, pharyngeal pain.<br>Presentation: ophthalmoplegia, cerebellar ataxia<br>PCR SARS-CoV2 negative. Serology SARS-CoV2 positive.                                                                | <b>BRAIN:</b> Left midbrain infarction. Thrombus anterior perforator artery with arterial wall enhancement.                                                                                                                                                                                                                                                                                                                                                                                                                  | Vasculitic/Thrombotic                        | Anticoagulation (LMWH)                                                                              | Normal at follow-up 3 months after presentation.                                                                                                                       |
| 33                 | 13<br>M            | None         | Vertigo, decreased hearing.<br>COVID serology positive at onset of symptoms. PCR not tested.                                                                                                                                                | BRAIN: Loss of normal labyrinthine T2 signal and abnormal enhancement                                                                                                                                                                                                                                                                                                                                                                                                                                                        | Neuritis: Vestibular Labyrinthitis           | High dose steroids                                                                                  | Improvement but incomplete resolution at 3 months. Additional follow-up scheduled.                                                                                     |
| 34                 | 7<br>M             | None         | 8 weeks prior to neurologic presentation: COVID-19/flu like symptoms of fever, cough, headache. PCR not available at presentation. Resolved with ongoing anosmia. Presentation: Flaccid paralysis upper and lower limbs                     | BRAIN: Normal<br>SPINE: Enhancement & thickening cauda equina.                                                                                                                                                                                                                                                                                                                                                                                                                                                               | Neuritis: cauda equina                       | High dose steroids                                                                                  | Improvement at discharge 3 weeks after presentation, residual sensory-motor polyneuropathy.                                                                            |
| 35                 | 12<br>F            | None         | Acute four limb and brainstem dysfunction. Anti-GM2 and PCR positivity for CMV. PCR for SARS-CoV-2 not available. Symptoms and MRI obtained when COVID-19 endemic. Serology testing performed when clinically available 3 months following. | BRAIN: Enhancement CN III, V, VII<br>SPINE : Enhancement cauda equina.                                                                                                                                                                                                                                                                                                                                                                                                                                                       | Neuritis: CN and cauda equina                | High dose steroids                                                                                  | Normal follow-up 6 months after presentation with residual mild fatigue.                                                                                               |
| 36                 | 14.25<br>M         | None         | Headache, ataxia, cerebellar signs, meningismus. PCR not available. Serology positive.                                                                                                                                                      | BRAIN: Swollen cerebellar hemisphere without restricted diffusion. Enhancement of bilateral CN VII                                                                                                                                                                                                                                                                                                                                                                                                                           | Neuritis: CN<br><br>Cerebellitis             | High dose steroids                                                                                  | Full recovery at three months                                                                                                                                          |
| 37                 | 0.83<br>M          | None         | 1 week prior to neurologic presentation: Mild febrile illness.<br>Presentation: right ptosis, hypotonia, encephalopathy<br>PCR negative at presentation.<br>Serology positive 1 week following.                                             | BRAIN:<br>Presentation: Patchy T2 hyperintensities in cerebral WM, thalami, brainstem and cerebellum. Associated foci of enhancement and restricted diffusion.<br>Enhancement CN III<br>Follow-up 3 days: Restricted diffusion in basal ganglia and temporal lobe.<br>Follow-up 10 days: Evolving focal lesions. Cerebellar and temporal lobe volume loss<br>SPINE:<br>Presentation: Long segment cord T2 hyperintensity with central gray predominance and without enhancement.<br>Follow-up 10 days: Atrophy thoracic cord | ADEM-like<br><br>Neuritis:CN<br><br>Myelitis | Supportive measures including high dose steroids. Extensive workup for alternate diagnoses negative | Incomplete resolution at discharge with facial weakness, ptosis, ophthalmoplegia, dysphagia, not standing without support. Relapse at 3 months after weaning steroids. |
| 38                 | 4.17<br>M          | None         | Seizures, facial palsy, four limb dysfunction, skin rash.<br>PCR negative.                                                                                                                                                                  | BRAIN: T2 hyperintense lesions cerebral cortex and thalamus. No enhancement.                                                                                                                                                                                                                                                                                                                                                                                                                                                 | ADEM-like                                    | High dose steroids<br><br>Anti-MOG positive                                                         | Improvement 2.5 months after presentation with mild cerebellar ataxia.                                                                                                 |

Table 8: Category 4 indeterminate time period cases not fulfilling either acute COVID-19 or MIS-C (PIMS-TS) criteria. White: Vasculitic-thrombotic. Light gray: Neuritis with or without cerebellitis. Intermediate gray: ADEM-like with or without neuritis and myelitis.

## ASPNR PECOBIG Collaborator Group

| First name                      | Surname        |
|---------------------------------|----------------|
| Sameen                          | Akhtar         |
| Douglas                         | Alden          |
| Suraj                           | Amonkar        |
| Pascale                         | Aouad          |
| Mélodie                         | Aubart         |
| Jose Alejandro                  | Bacalla        |
| Alcino A                        | Barbosa        |
| Romain                          | Basmaci        |
| Laureline                       | Berteloot      |
| Thomas                          | Blauwblomme    |
| Gilles                          | Brun           |
| Olivia                          | Carney         |
| Judith                          | Chareyre       |
| Gérard                          | Chéron         |
| Pablo Picasso De Araujo         | Coimbra        |
| Volodia                         | Dangouloff-Ros |
| Felice                          | D'Arco         |
| Rob                             | Dineen         |
| Loic                            | De-Pontual     |
| Isabelle                        | Desguerre      |
| Wissam                          | Elfallal       |
| D. Gareth                       | Evans          |
| Suely Fazio                     | Ferraciolli    |
| Nadine                          | Girard         |
| Fabício Guimarães               | Gonçalves      |
| Ivan                            | Gonzalez       |
| P. Ellen                        | Grant          |
| David                           | Grévent        |
| Carolina Valduga de Alencastro  | Guimaraes      |
| Jane                            | Hassell        |
| Fabiana C. C.                   | Hirata         |
| Jeffrey                         | Jacob          |
| Kandise                         | Jackson        |
| Blaise V.                       | Jones          |
| Robin                           | Joseph         |
| Ah Young                        | Jung           |
| Ian                             | Kamaly-Asl     |
| Amna                            | Kashgari       |
| John-Paul                       | Kilday         |
| Alyssa                          | Kirsch         |
| Manoelle                        | Kossorotoff    |
| Anant                           | Krishnan       |
| Shilpa                          | Kulkarni       |
| Marianne                        | Leruez-Vill    |
| Fabrice                         | Lesage         |
| Raphaël                         | Levy           |
| Yi                              | Li             |
| Carol Cavalcante de Vasconcelos | Lima           |

|                           |                 |
|---------------------------|-----------------|
| Lokesh                    | Lingappa        |
| Ulrike                    | Löbel           |
| Roberto                   | Lopez-Alberola  |
| Leandro Tavares           | Lucato          |
| Daniela Duarte            | Moreira         |
| Jonathan G.               | Murnick         |
| Sarah                     | Nahmani         |
| Shubra                    | Pagariya        |
| Julija                    | Pavaine         |
| Bryan                     | Philbrook       |
| Ana Cláudia               | Piovesan        |
| Kelsey E.                 | Poisson         |
| Nihaal                    | Reddy           |
| Phil                      | Riley           |
| Andrea                    | Romsauerova     |
| Charlies-Joris            | Roux            |
| Carlos                    | Rugilo          |
| Gaurav                    | Saigal          |
| Gabriel Lucca de Oliveira | Salvador        |
| David                     | Seidenwurm      |
| Isabelle                  | Sermet-Gaudelus |
| Jai                       | Sidpra          |
| Sniya Valsa               | Sudhakar        |
| María Sol                 | Toronchik       |
| Gilbert                   | Vézina          |
